# Supplementary material for: miR-424-5p represses the metastasis and invasion of intrahepatic cholangiocarcinoma by targeting ARK5
Source: PubMed Central journal article supplement — Int J Biol Sci. 2019 Jun 4;15(8):1591–9. doi: 10.7150/ijbs.34113 (PMC6643209; doi:10.7150/ijbs.34113), 2019-06-04
Supplement: ijbsv15p1591s1.pdf [file ijbsv15p1591s1.pdf]

# Supplementary

## CCLP-1

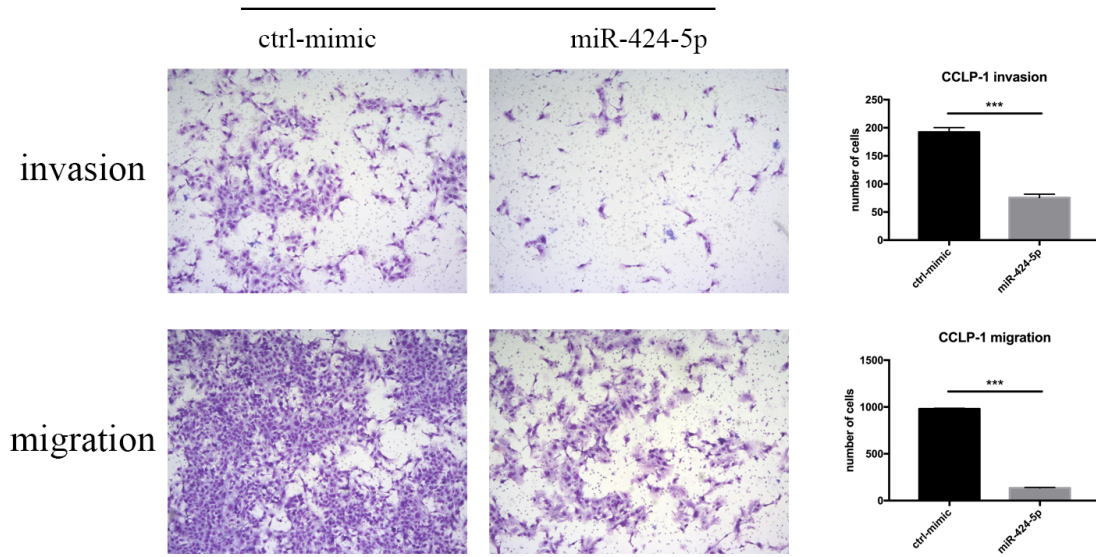

Supplement Figure 1. Transwell assays on CCLP-1 cells. Over-expression of miR-424-5p inhibited the metastasis of CCLP-1 cells. \*\*\*:  $p < 0.001$

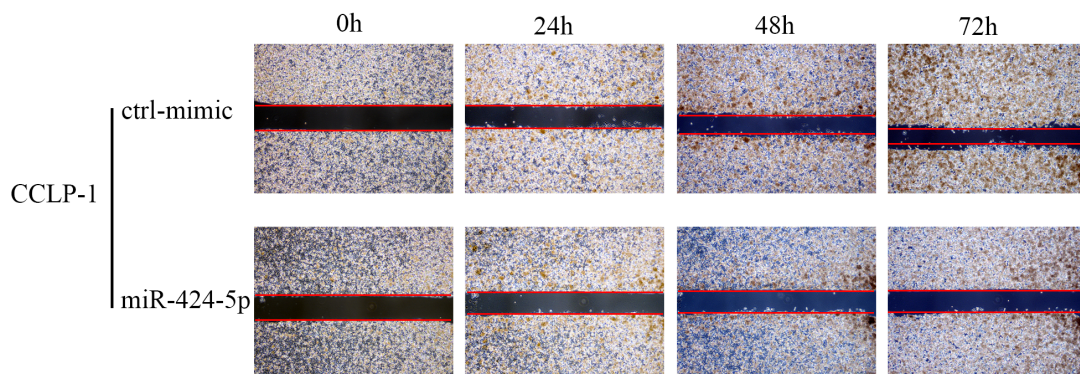

Supplement Figure 2. Wound-healing assay on CCLP-1 cell.

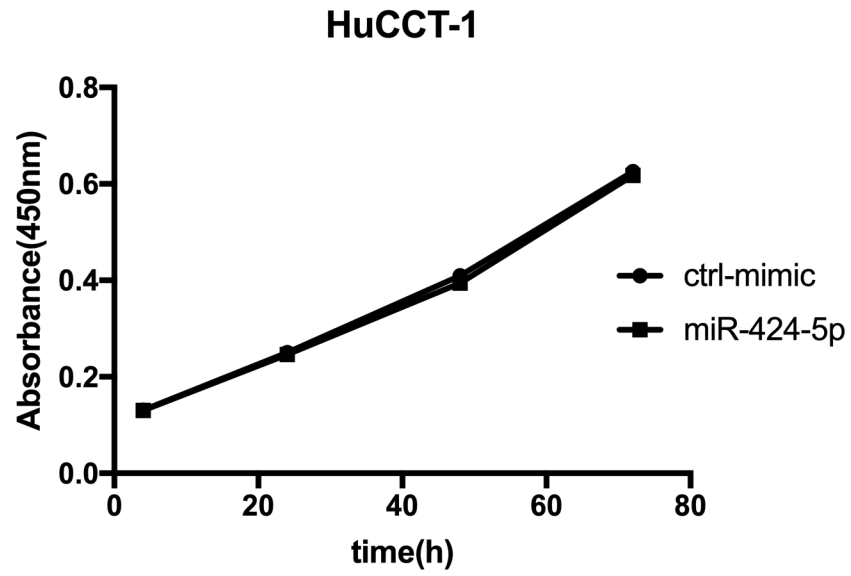

Supplement Figure 3. CCK-8 assay on HuCCT-1 cell. Over-expression of miR-424-5p showed no difference to ctrl-mimic group on cell proliferation.

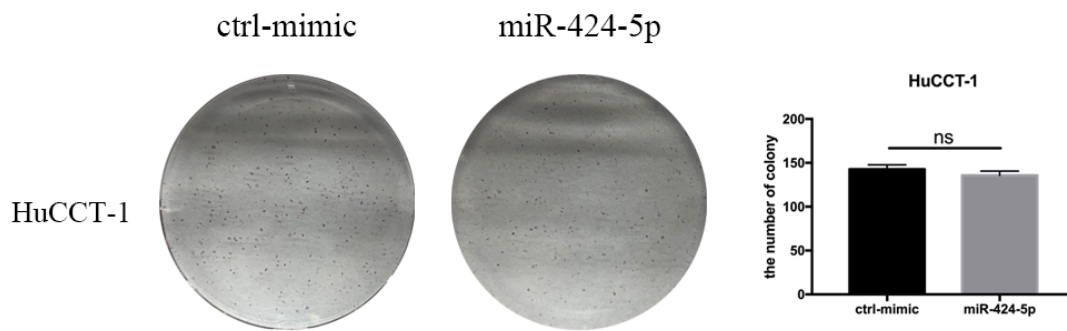

Supplement Figure 4. Colony formation assays on HuCCT-1 cell. Over-expression of miR-424-5p made no effects on colony-formation.

Supplement Table 1. target genes of miR-424-5p and their primers for PCR

| GENE    |         | Sequence (5'-3')        |
|---------|---------|-------------------------|
| ARK5    | Forward | GAGTCCACTCTATGCATC      |
|         | Reverse | ATGTCCTCAATAGTGGCC      |
| PPP2R1B | Forward | CTTGGCGCGTTTCGCTATATG   |
|         | Reverse | GGCGGGGATGAGGTCATTTAG   |
| SIRT4   | Forward | GAATCGGGGATAACCAGACTACA |
|         | Reverse | GCCAGCCTACGAAGTTTCTCG   |
| IARS    | Forward | CTGTTAGCAGACTTGGCCGAT   |
|         | Reverse | AGAAGGGCATGACTTTCACAC   |
| SOX6    | Forward | GGATGCAATGACCCAGGATTT   |
|         | Reverse | TGAATGGTACTGACAAGTGTTGG |
| DMTF1   | Forward | TCACCACAATGGCTACGAAGT   |
|         | Reverse | AAGACAGGGAACGAAACATCC   |
| PSAT1   | Forward | TGCCGCACTCAGTGTTGTTAG   |
|         | Reverse | GCAATTCCCGCACAAGATTCT   |
| COPS7B  | Forward | GTGTATCCCCTACTCCGTGTT   |
|         | Reverse | CATTCATGCAGGGTCTTGACA   |
| ZBTB44  | Forward | CAAATCTTCCGGGCACATAAGG  |
|         | Reverse | GGCTTGGCCTACAAGTTTGGT   |

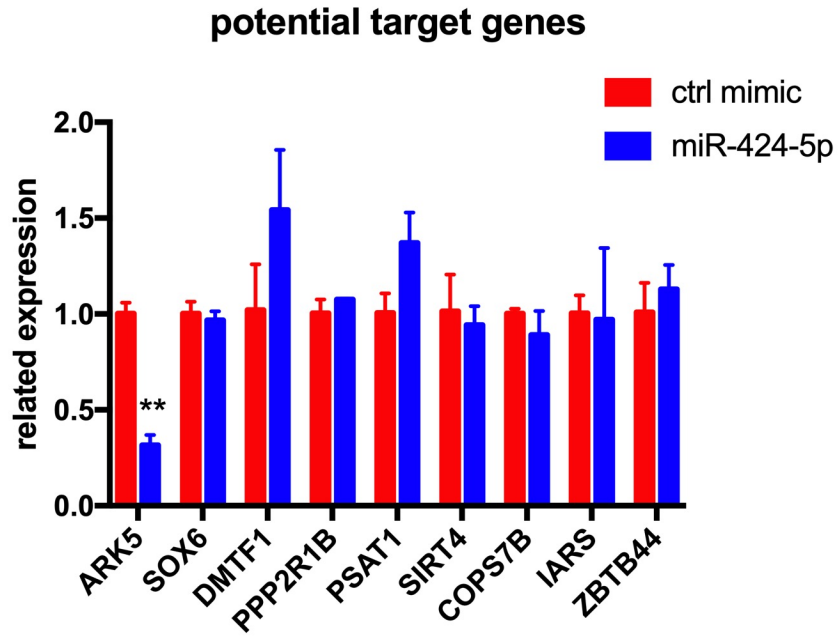

Supplement Figure 5. qRT-PCR result of targets of miR-424-5p. We performed qRT-PCR assay on RBE cells transfected with ctrl-mimic or miR-424-5p-mimic.

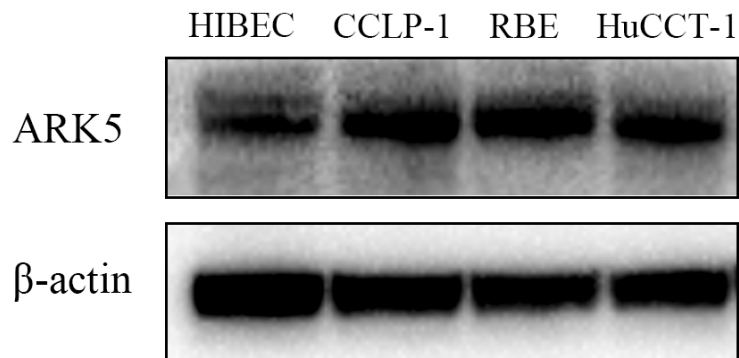

Supplement Figure 6. WB result of ARK5 expression in HIBEC and 3 ICC cell lines.
